# Supplementary material for: Quantitative Trait Loci for Light Sensitivity, Body Weight, Body Size, and Morphological Eye Parameters in the Bumblebee, Bombus terrestris
Source: PubMed Central journal article supplement (PMC4415782; doi:10.1371/journal.pone.0125011), 2015-04-30

**Quantitative trait loci for light sensitivity, body weight, body size, and morphological eye parameters in the bumblebee, *Bombus terrestris***

Kevin Maebe<sup>1</sup>, Ivan Meeus<sup>1</sup>, Jan De Riek<sup>2</sup>, Guy Smagghe<sup>1,\*</sup>

**S4\_Fig: Histogram of all investigated morphological traits. Forewing radial cell length (RC), metatarsus length (MT\_L), metatarsus width (MT\_W), tibia length (Ti\_L), tibia width (Ti\_W), Femur length (Fm\_L), femur width (Fm\_W), trochanter length (Tr\_L), trochanter width (Tr\_W), tarsus length (tarsus), length of hind leg (Leg), length of compound eye (E\_L), width of compound eye (E\_W), total surface of compound eye (E\_S), diameter of facet (Facet), total numbers of ommatidia (Om), diameter of median ocellus (MOc), body mass (weight), and the transformed critical light sensitivity in blue and UV light conditions (log\_blue and log\_UV, respectively).**

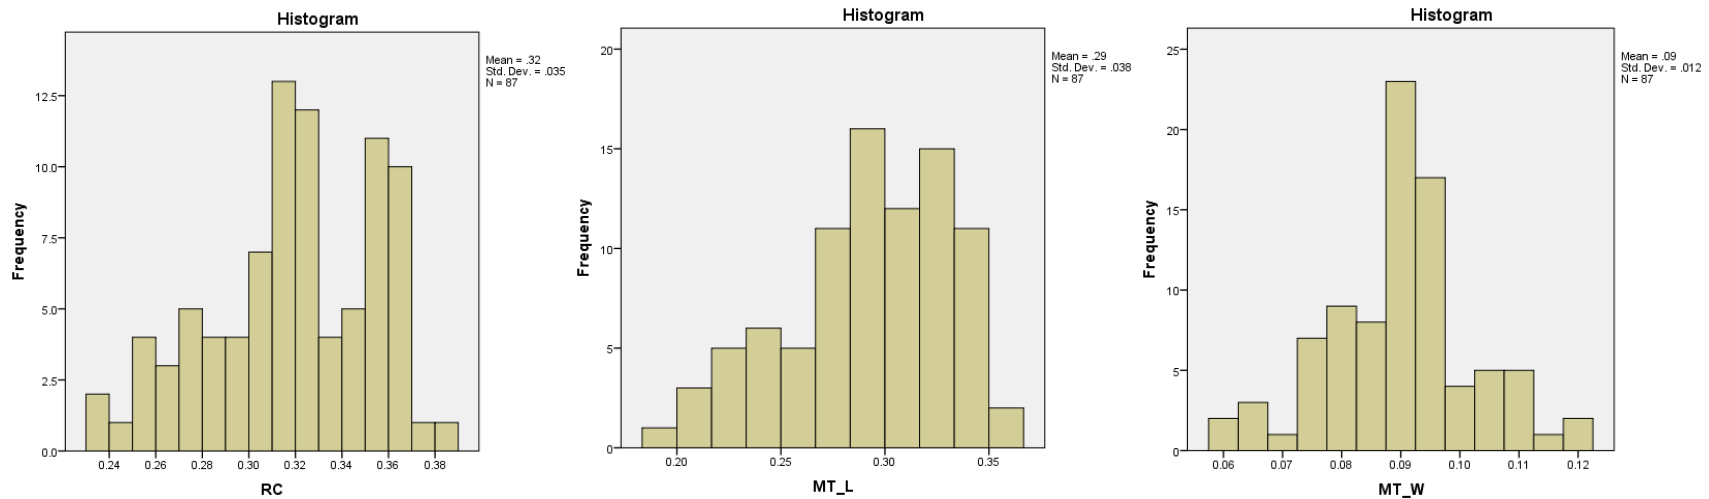

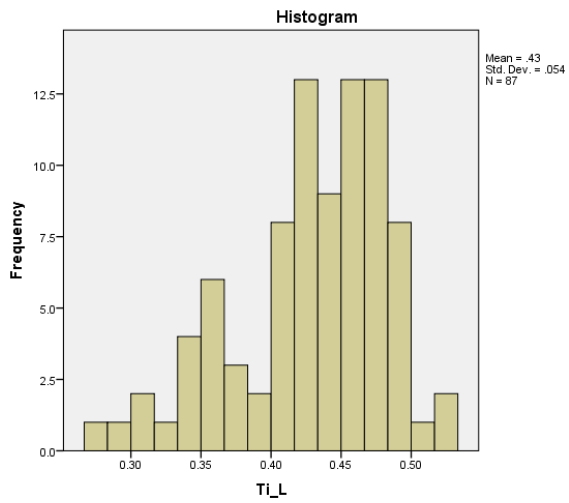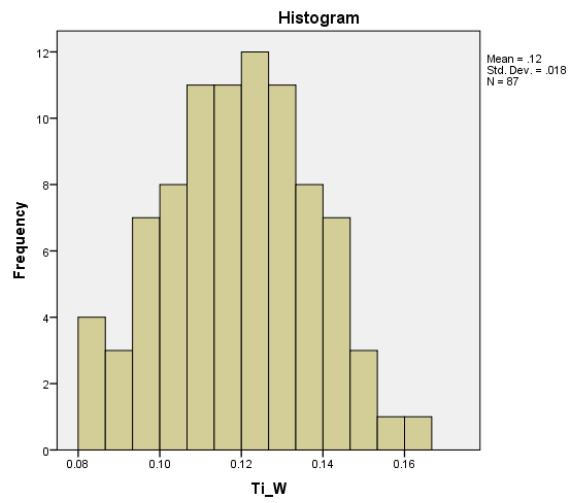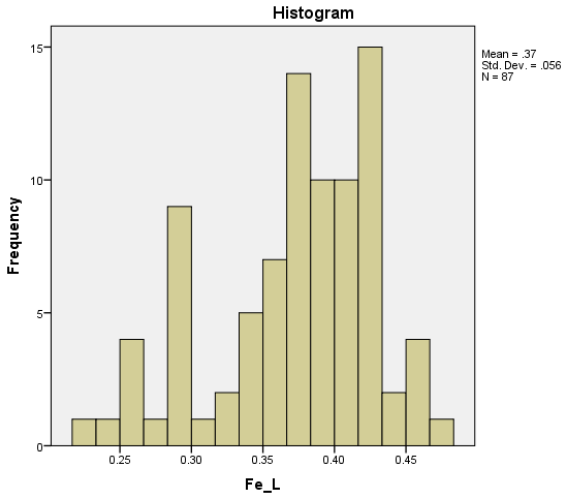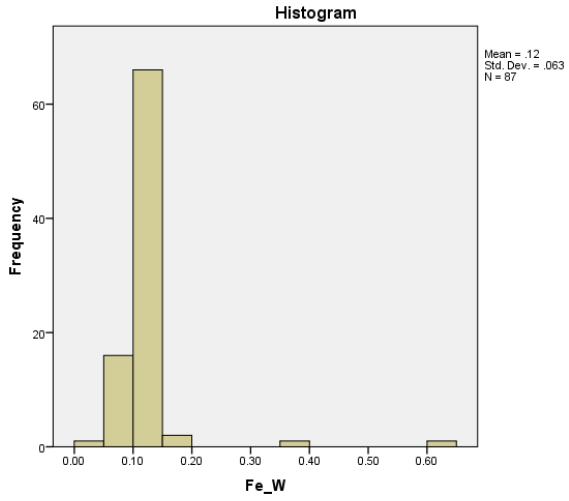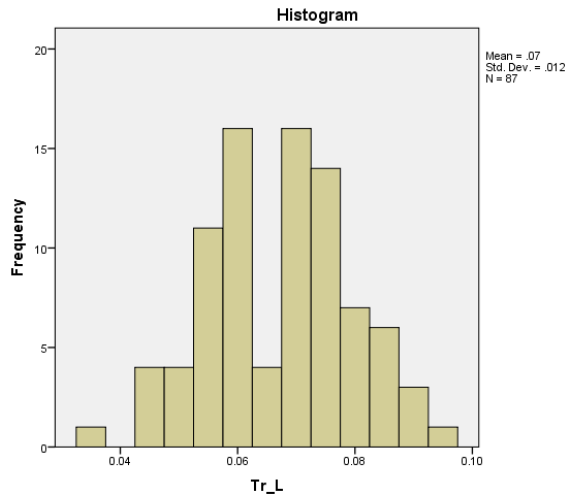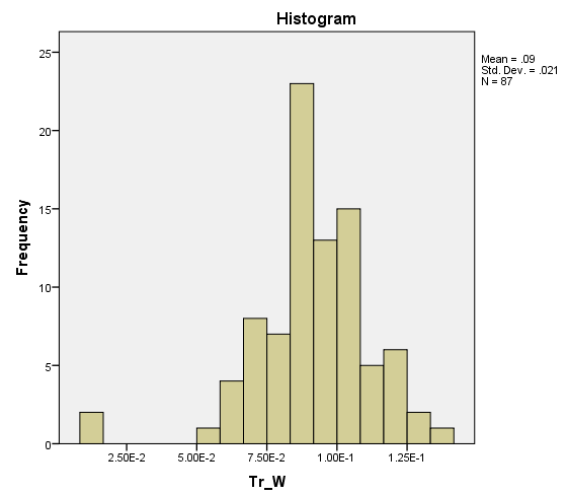

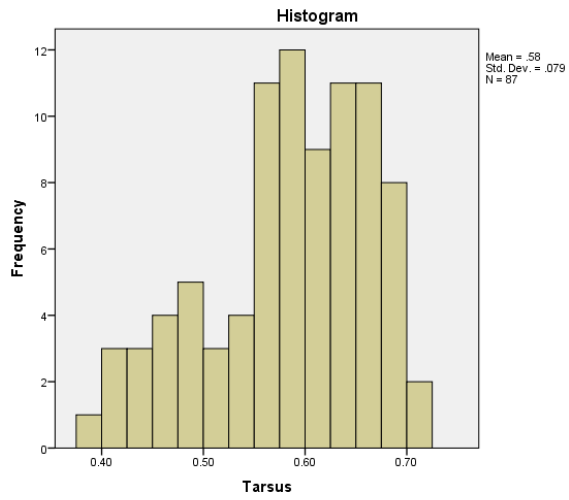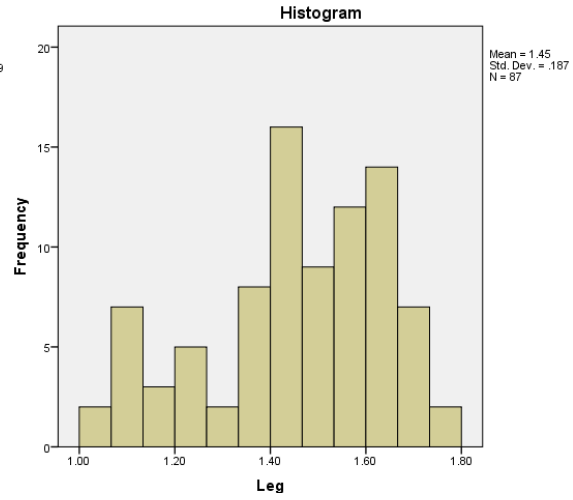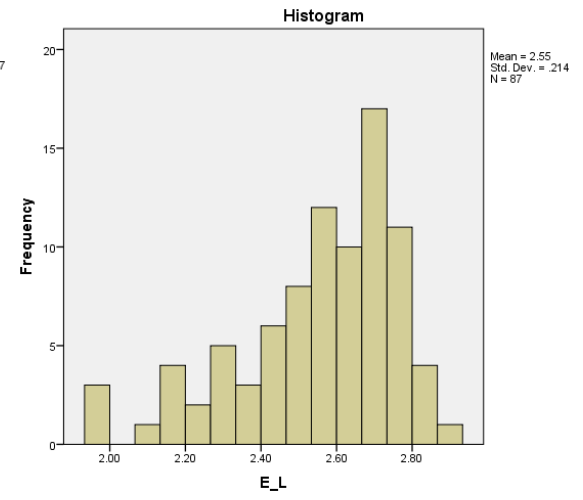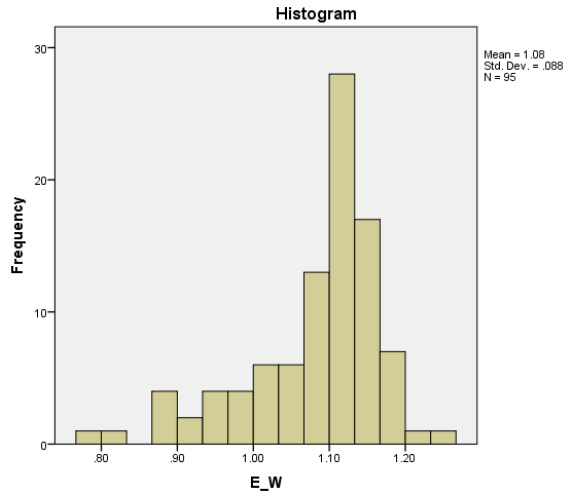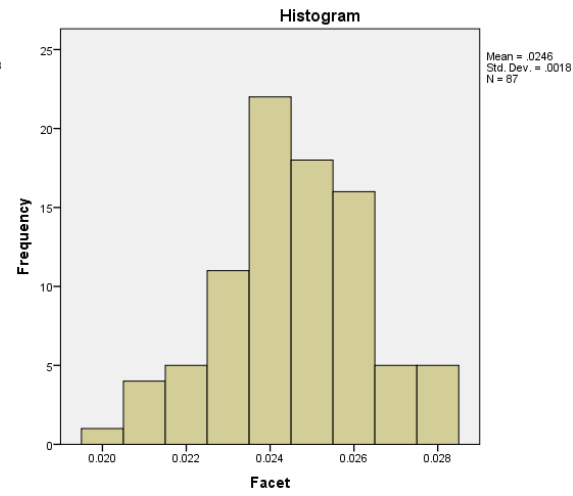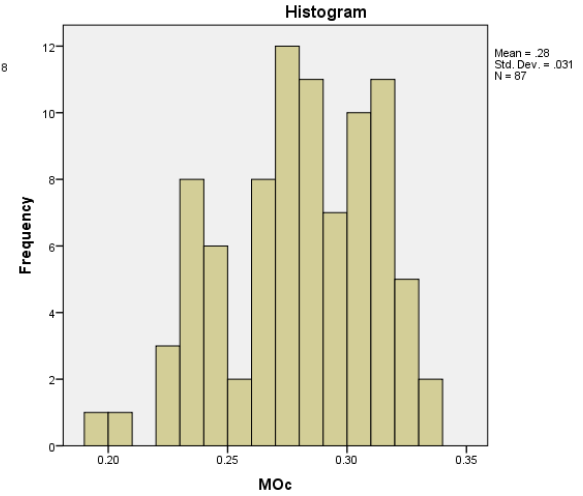

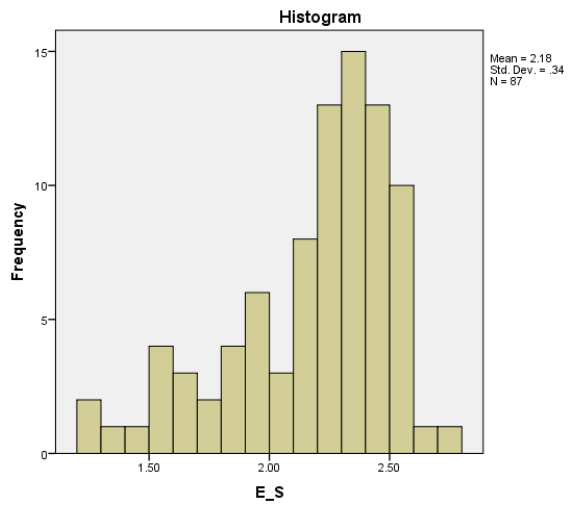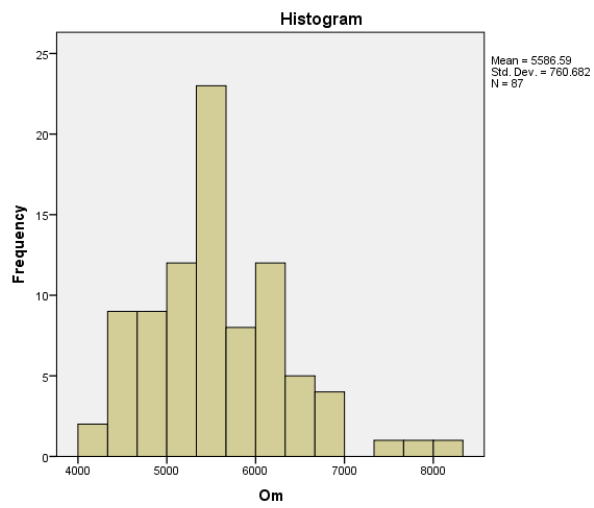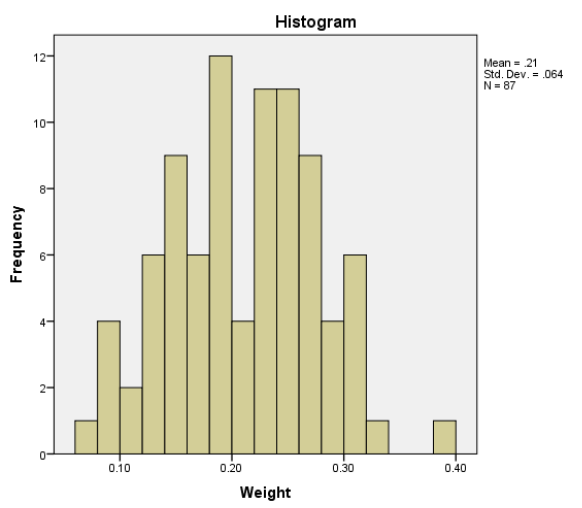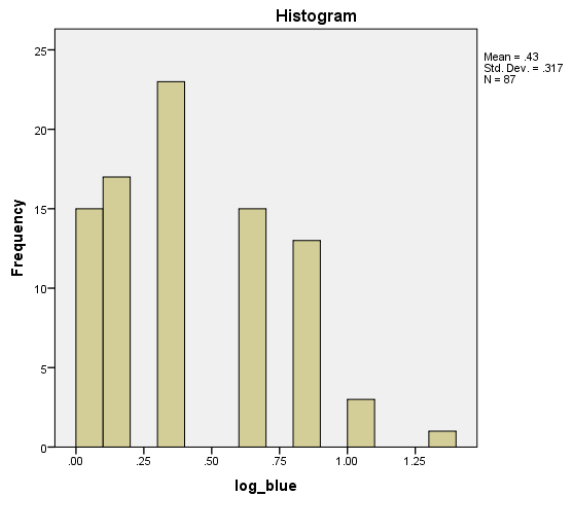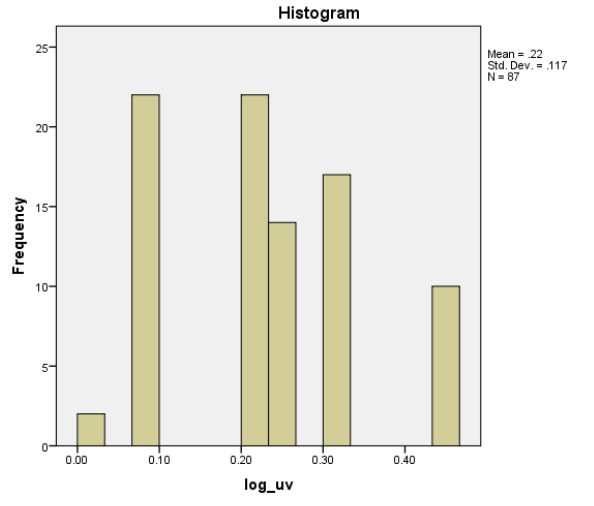

Supplement: pone.0125011.s001.pdf [file pone.0125011.s001.pdf]
