# Supplementary material for: Quantitative Trait Loci for Light Sensitivity, Body Weight, Body Size, and Morphological Eye Parameters in the Bumblebee, Bombus terrestris
Source: PubMed Central journal article supplement (PMC4415782; doi:10.1371/journal.pone.0125011), 2015-04-30
Supplement: pone.0125011.s002.pdf [file pone.0125011.s002.pdf]

## Quantitative trait loci for light sensitivity, body weight, body size, and morphological eye parameters in the bumblebee, *Bombus terrestris*

Kevin Maebe<sup>1</sup>, Ivan Meeus<sup>1</sup>, Jan De Riek<sup>2</sup>, Guy Smagghe<sup>1,\*</sup>

**S1\_Table: Characteristics of the microsatellite markers used. From each SSR marker we present the forward and reverse primer sequences, GenBank accession number, annealing temperature (*Ta*), the observed size range of the PCR product, the location (LG) and the original reference.**

| Marker     | Accession number (GenBank) | LG <i>B.t.</i> | Forward primer sequence | Reverse primer sequence | <i>Ta</i> | Range   | Source              |
|------------|----------------------------|----------------|-------------------------|-------------------------|-----------|---------|---------------------|
| 0007_47n22 | FQ377670                   | B11            | GGTTATGATTGCACACTGTTT   | GCACATTAAATTATTGCGTACA  | 60        | 152-158 | Stolle et al., 2011 |
| 0043_71h15 | FQ377672                   | B03            | AATTTATGCGAAGATGATGTTA  | TTAGTAACTGACTGCTGCTACG  | 60        | 164     | Stolle et al., 2011 |
| 0053_71f10 | FQ377673                   | B02            | GTAAAGCGGAGAAACAAGATAG  | CTTCTCCACCTCTCATTG      | 60        | 168     | Stolle et al., 2011 |
| 0062_62f17 | FQ377675                   | B02            | TAAAAATTGCTGGCTGGAAGCAT | CAGAGAACAACATCGTGGCAA   | 60        | 197-213 | Stolle et al., 2011 |
| 0071_59g6  | FQ377677                   | B13            | TACGATTCACCGATCTTAAATA  | TTAATCGGAAGACTGGAC      | 60        | 187-191 | Stolle et al., 2011 |
| 0078_59o4  | FQ377680                   | B14            | AATCTCGTAATTCCAAGCTTAC  | GATTTACTTGGGCAGACTTTAG  | 60        | 150-156 | Stolle et al., 2011 |
| 0083_47g5  | FQ377681                   | B13            | TCTTAATCGATTCAAACATCCT  | GATGAGTGTATCCTTCTGAAT   | 60        | 136-148 | Stolle et al., 2011 |
| 0103_38m23 | FQ377683                   | B05            | GTATCGCGATTGGTAATTATG   | ACATCTTTGTATCTTCGAATCC  | 60        | 187     | Stolle et al., 2011 |
| 0141_44j1  | FQ377689                   | B02            | CTAGGCCAGAATAGAGTCGTC   | AGATTCGAGTGCTTTCTCT     | 60        | 137-157 | Stolle et al., 2011 |
| 0152_56e6  | FQ377691                   | B09            | GAACCTGTGTTCTCTCGTA     | TCTACTACACTTTGTCCGTTGA  | 60        | 146-148 | Stolle et al., 2011 |
| 0162_69a8  | FQ377693                   | B12            | GAAGGAGTTGAATCATTAGGTC  | TTCGTAGGGTGATAGAGGTG    | 60        | 155-157 | Stolle et al., 2011 |
| 0172_44e21 | FQ377695                   | B04            | ATAATGCAGTTCCTCGAGTCT   | GCTGTATTGGGTAGAAGAAAGA  | 60        | 148-150 | Stolle et al., 2011 |
| 0177_44p18 | FQ377696                   | B03            | TTGACGATATTCTCTCACGATA  | GCGTTTCTATCAGAAGCTACAC  | 60        | 169-172 | Stolle et al., 2011 |
| 0180_50k19 | FQ377697                   | B17            | CCTTCCTGGAGGTAACCTTCTT  | TTCATACGCGAGGTATGTGGAG  | 60        | 216     | Stolle et al., 2011 |
| 0187_69g1  | FQ377698                   | B18            | TCTTGTATTAACCCAACGTACA  | GCAGCTAACGGATCTTATTCTA  | 60        | 161-169 | Stolle et al., 2011 |
| 0195_69j13 | FQ377699                   | B01            | CTGAACAATAATTACCGACAGA  | GACAATTTTCGATTACGAGACTT | 60        | 150-154 | Stolle et al., 2011 |
| 0196_69p16 | FQ377700                   | B01            | CGCTGAATCTAGACGCTATAA   | ATCAGTGGCAATACATGTAAAC  | 60        | 188-194 | Stolle et al., 2011 |
| 0198_69f24 | FQ377701                   | B01            | AAATAGCTCGACACTGAGAGAC  | ATCCATAAGCGTGTAAAGAAAGT | 60        | 164-168 | Stolle et al., 2011 |
| 0207_63e15 | FQ377704                   | B03            | TGTCTTTACGTCCATGTTACAC  | CGTTCTCTATACGGCAAGTT    | 60        | 193-197 | Stolle et al., 2011 |
| 0216_63a9  | FQ377705                   | B05            | TCATAACGTTTCACATCTTGAC  | GTCTAAAGTTCTATGCCACGTT  | 55        | 175-177 | Stolle et al., 2011 |

| Marker     | Accession number<br>(GenBank) | LG <i>B.t.</i> | Forward primer sequence    | Reverse primer sequence | <i>T<sub>a</sub></i> | Range   | Source              |
|------------|-------------------------------|----------------|----------------------------|-------------------------|----------------------|---------|---------------------|
| 0221_63h9  | FQ377706                      | B03            | GTTATCGTATTTACACCGGAAC     | TTTCTTCGCAAGATAGAGAGAG  | 55                   | 154-158 | Stolle et al., 2011 |
| 0222_63d21 | FQ377707                      | B15            | TCAATCTTCGATCTACGTAACA     | AAATACGTGGCATTAACTCG    | 60                   | 165-169 | Stolle et al., 2011 |
| 0232_81d20 | FQ377710                      | B13            | GCGAGTCTGTACAATGAATATG     | ACGGAACAACGAACAACCTTA   | 60                   | 171-177 | Stolle et al., 2011 |
| 0242_81d21 | FQ377711                      | B09            | CCTCGATATCACCATAGGAA       | ACAGATGTATCCGTGCAGTT    | 60                   | 183-187 | Stolle et al., 2011 |
| 0244_81i8  | FQ377712                      | B13            | AGAAGCTACAGTTGATGAGGAT     | GAGTTCTCTGCTTGTCTGATG   | 60                   | 142-150 | Stolle et al., 2011 |
| 0255_16m20 | FQ377713                      | B16            | TCGTAAAGCTGAGAGCTATAAA     | AAGATCGAGAGAACAGGATTAG  | 60                   | 155-161 | Stolle et al., 2011 |
| 0266_60m24 | FQ377714                      | B10            | AACGTTTCGAGAATAATAAAGC     | AGGTAAAATGAACGAGACAAAG  | 60                   | 213     | Stolle et al., 2011 |
| 0268_60h13 | FQ377715                      | B05            | TCTGTAAACACAAGAGAAGTTCA    | TCTGACGGTAGGACAATACTAA  | 60                   | 210-203 | Stolle et al., 2011 |
| 0275_90o12 | FQ377716                      | B04            | AGGACATCTGGTCTTAATGAAA     | TACGCAGATCGTTGTTATACAT  | 60                   | 163-165 | Stolle et al., 2011 |
| 0281_20d1  | FQ377719                      | B06            | GTAGCCTTCTCTATGCCATTT      | AGAACGGGTACGTGTAAATAGT  | 60                   | 131-135 | Stolle et al., 2011 |
| 0289_60i4  | FQ377722                      | B10            | TGTTGTATTGTGAATGTACACG     | GCATGTAAACCAGACTTAATTG  | 54                   | 162-164 | Stolle et al., 2011 |
| 0291_60p14 | FQ377723                      | B03            | TCTGCTACGTTTAATTACTGGA     | ACCCTCTTACCTATTTGGTGTGA | 54                   | 196     | Stolle et al., 2011 |
| 0292_60b14 | FQ377724                      | B03            | GCGTACGATATAAGGAAAGAGA     | GTGAGTTCGAGCAATAATCC    | 55                   | 153-167 | Stolle et al., 2011 |
| 0294_10o4  | FQ377725                      | B09            | AGTACGATAAAGCCAGGAAAG      | TGTATGCCTATTGTACGAGTGT  | 55                   | 169-177 | Stolle et al., 2011 |
| 0303_10b14 | FQ377727                      | B02            | AAAGTGTCATCGACCAGAAG       | CTCGTTCGTTTAATTAGTCGTC  | 60                   | 164     | Stolle et al., 2011 |
| 0304_9i13  | FQ377728                      | B04            | GTATGAGTGAGTGATGTGCAAG     | CCCTTCATCTCTGAACAATATC  | 55                   | 154-160 | Stolle et al., 2011 |
| 0320_15c24 | FQ377729                      | B12            | TTTCATTGTTCCCTATTTCA       | CCTTACGTACTTCCGTTATCTC  | 55                   | 162     | Stolle et al., 2011 |
| 0321_15f5  | FQ377730                      | B17            | ATGACAAAATATAGCACTGTATGTGT | GCAGAACGAACAAGATGTTCAA  | 60                   | 210-212 | Stolle et al., 2011 |
| 0336_1124  | FQ377734                      | B13            | ACTTAGACACGCCTCAATTATC     | GTTGAACCTTTGTTGAGAAGAT  | 60                   | 114-136 | Stolle et al., 2011 |
| 0338_2i5   | FQ377735                      | B07            | TCGTACTTCGTTTCATCTAATCA    | GGAATTTGTAATTTTCGTTTGT  | 54                   | 172-174 | Stolle et al., 2011 |
| 0357_2o10  | FQ377736                      | B05            | CGACAGTTGTTATTACGATGAA     | CCCTTTAAGCAGACGTATTTAG  | 60                   | 163-171 | Stolle et al., 2011 |
| 0360_2n11  | FQ377737                      | B01            | ATAATTCCCGAACGAATGTC       | TAACGTTATCCGGGTACAAA    | 55                   | 231-237 | Stolle et al., 2011 |
| 0365_7n6   | FQ377738                      | B03            | GCCATCAATAGATCAAAGAAAT     | CTCCTCGGTCTGTTGTTTAT    | 60                   | 138-140 | Stolle et al., 2011 |
| 0370_12o14 | FQ377739                      | B11            | GGAACACGTATTACACAAAGTCT    | CGAGAGACAGAGAGAAAGAAAG  | 54                   | 221-225 | Stolle et al., 2011 |
| 0374_12n22 | FQ377741                      | B09            | CCAGAGTGAGAAAGAGAGAGAG     | CATAAATGTCCACCTACATC    | 60                   | 133     | Stolle et al., 2011 |
| 0379_5i10  | FQ377743                      | B07            | AGAGAGAAAATCGAGGAAAAG      | CGCAAAGTATTGCATAAATAAG  | 54                   | 201-205 | Stolle et al., 2011 |
| 0382_5e22  | FQ377744                      | B11            | GATAGAAACGACCAGGCTTAT      | GGAACGAGTAACAAGGTAGAGA  | 60                   | 167-169 | Stolle et al., 2011 |
| 0392_16e2  | FQ377746                      | B09            | AATTATCATCGCGTAGGTACA      | GTAAGCGTTTACACGAACAAC   | 60                   | 183     | Stolle et al., 2011 |

| Marker     | Accession number<br>(GenBank) | LG <i>B.t.</i> | Forward primer sequence  | Reverse primer sequence | <i>T<sub>a</sub></i> | Range   | Source              |
|------------|-------------------------------|----------------|--------------------------|-------------------------|----------------------|---------|---------------------|
| 0403_13g6  | FQ377748                      | B07            | ATTTACTGCTCGATACTTTCGT   | ATCGAGTTCTTATTTTCATCCTG | 60                   | 175-179 | Stolle et al., 2011 |
| 0428_13l21 | FQ377750                      | B02            | AAGGTAACAGAAGAGACGATTG   | GTCATTGTCAAGAGGTGGAG    | 60                   | 154-156 | Stolle et al., 2011 |
| 0466_5f11  | FQ377753                      | B14            | GTGTGTGCAAATAGCTACAGAT   | GTCCCTTTACCCTTTAGATACC  | 60                   | 163-171 | Stolle et al., 2011 |
| 0482_3k3   | FQ377756                      | B13            | ATGGCAAGTGTTCCTCGTACT    | ATCTATTTACCAGCGAAGCTC   | 54                   | 204     | Stolle et al., 2011 |
| 0487_3f11  | FQ377758                      | B12            | CACCTTACAATATAGGTCAGTTGT | GTCTAGGTGCTCAATGGATATT  | 55                   | 144-152 | Stolle et al., 2011 |
| 0503_3m14  | FQ377760                      | B13            | ACAACATAATTTGCTGCCTCTAC  | TAGGATCATTAAACGAGTCTCC  | 60                   | 167-183 | Stolle et al., 2011 |
| 0526_4c10  | FQ377761                      | B07            | TCACGTTGTGTCAACTGTAAA    | AGATTCAAGACGAAAGAATTTG  | 55                   | 162-176 | Stolle et al., 2011 |
| 0533_15c9  | FQ377762                      | B07            | CGAAGAACATAAGCAGAGGTAG   | CTTCCTCTTCGGTTCTCATA    | 60                   | 160     | Stolle et al., 2011 |
| 0535_15i17 | FQ377763                      | B05            | GTCGCATTAAATACAAGCTACA   | TTTCAAAGTGATATACAGGGAAG | 55                   | 139-157 | Stolle et al., 2011 |
| 0543_6o7   | FQ377764                      | B12            | AGCTAAATTAACCAACACCAAT   | GGCAGAGGAATATGATACAAGT  | 55                   | 163-181 | Stolle et al., 2011 |
| 0553_18c8  | FQ377768                      | B09            | AGGATTCCATTTTCGAGAATAA   | CAATGCACTACAAAGTTAGTTCC | 54                   | 236-242 | Stolle et al., 2011 |
| 0566_20o5  | FQ377772                      | B03            | TGTTAATCGTCTGTCACCTTT    | GTAGCAAGAAGTAGGCAAATG   | 55                   | 180     | Stolle et al., 2011 |
| 0576_20n23 | FQ377773                      | B08            | CCGTGCTATACTCACATTTCTA   | ACGATCTATGTACCACGATTCT  | 55                   | 166-168 | Stolle et al., 2011 |
| 0579_22m16 | FQ377774                      | B10            | GCCAGGTACATATATCCCTATT   | TTCCATATTTGCTGTCACCTTT  | 60                   | 186-202 | Stolle et al., 2011 |
| 0583_22l4  | FQ377776                      | B15            | CGAATGAAATTAGCTCCACTAC   | CAATTTCTTTCTCTTACGAAGC  | 60                   | 126-140 | Stolle et al., 2011 |
| 0594_19n18 | FQ377778                      | B15            | TTCAGAAGCATTCTCGAATTA    | ATACGAAGAGAAATAGGGTACG  | 60                   | 208-212 | Stolle et al., 2011 |
| 0606_19m4  | FQ377781                      | B02            | ATAACGAGGAGAGTGGTAACTG   | GTCTCCTAGCATCTTCTTTGTAA | 60                   | 235     | Stolle et al., 2011 |
| 0607_19k14 | FQ377782                      | B07            | TCCATATGAAGATCACAGAGAA   | TTAATCAGTGCATGCTTAGTGT  | 60                   | 154-160 | Stolle et al., 2011 |
| 0608_19h1  | FQ377783                      | B17            | GATCGATAAACGTCCAACCTTAC  | ATGGATTCTATCATCAATTCGT  | 60                   | 209-211 | Stolle et al., 2011 |
| 0613_19h23 | FQ377784                      | B12            | TTTATTCTACGCAAATGGTG     | TATCAATATCAGTATCGGCATC  | 60                   | 190-222 | Stolle et al., 2011 |
| 0614_19d6  | FQ377785                      | B08            | AAGTAGAACGGATACAGAAACG   | ACTCCAGTATGAGATGGAAGTC  | 60                   | 186-196 | Stolle et al., 2011 |
| 0627_20n22 | FQ377789                      | B08            | CGTGTAACACACATAAAGAGC    | GTTTCGTCTTCGCTCTAGATAC  | 60                   | 176-192 | Stolle et al., 2011 |
| 0631_34k4  | FQ377790                      | B05            | ATAACCGAAAGACAAAGTTCAC   | GCTCTTGCTCTTCTTTATCTT   | 60                   | 160     | Stolle et al., 2011 |
| 0632_34i8  | FQ377791                      | B03            | TTCCCGTATTATGTAACCTCAGA  | GCTTGGAAGAAGATAGTTAAACG | 60                   | 189     | Stolle et al., 2011 |
| 0636_34m4  | FQ377792                      | B14            | AGTGAAAAGTTGACGAAGAACA   | CCGAGATCTCTCTGTACTGT    | 60                   | 145-151 | Stolle et al., 2011 |
| 0644_83i19 | FQ377796                      | B06            | CATTGTCGAGTGAATATCGAG    | TAGAAATCATTGCAACAGAGAA  | 60                   | 166-168 | Stolle et al., 2011 |
| 0646_83e8  | FQ377798                      | B04            | GTTTCTCTTCCCTCTTTCC      | AAGATGCAGAGGAAAGTAAATG  | 60                   | 155-165 | Stolle et al., 2011 |
| 0655_82m17 | FQ377800                      | B14            | TACATCTACTCGTCTCCCTCTC   | ACGGATAGACAAACAGAGAATC  | 60                   | 134-136 | Stolle et al., 2011 |

| Marker     | Accession number<br>(GenBank) | LG <i>B.t.</i> | Forward primer sequence | Reverse primer sequence | <i>T<sub>a</sub></i> | Range   | Source              |
|------------|-------------------------------|----------------|-------------------------|-------------------------|----------------------|---------|---------------------|
| 0669_84i15 | FQ377804                      | B09            | TGCTTGACGAATATGAAATG    | AAACAGATCGAGAGAAAGAGAG  | 60                   | 170-180 | Stolle et al., 2011 |
| 0686_86i9  | FQ377807                      | B14            | AAAGATAGAAGAAGGAAGCACA  | TCGAACTATCCACCAGCTATAC  | 60                   | 130-136 | Stolle et al., 2011 |
| 0712_84o11 | FQ377811                      | B06            | TTTCGATGGTGGTTTGTACT    | CTTGCCGATATATTACCTCTTC  | 60                   | 198-210 | Stolle et al., 2011 |
| 0725_82m14 | FQ377814                      | B06            | TCTATCAAACACGTAAAGCGTA  | ATTTATGACCTCTCCTCTCACA  | 60                   | 161-195 | Stolle et al., 2011 |
| 0731_75c7  | FQ377815                      | B09            | GTGTACAGGCATACAGAAAGTG  | GAAAGAGGAAGAGAGAAATCAA  | 60                   | 181-185 | Stolle et al., 2011 |
| 0742_75d18 | FQ377818                      | B05            | ACAAAAGTGGTGCCATATTTATT | AGATACTGTGACCTAAGGGAAA  | 60                   | 170-174 | Stolle et al., 2011 |
| 0745_75i17 | FQ377819                      | B13            | GAATACACATGTCTCTGGTTCA  | GAGAGTCGATCTTGTGAGAGAT  | 60                   | 168     | Stolle et al., 2011 |
| 0751_11c2  | FQ377820                      | B16            | CTTCAACGTCCATCCTGTATC   | CCATCTTTTTACCCTTGATATAC | 60                   | 193-199 | Stolle et al., 2011 |
| 0752_11m6  | FQ377821                      | B10            | AAATTAACACCAGCGTTCT     | AACTTTCTAAGCGTGTGCAG    | 60                   | 163-175 | Stolle et al., 2011 |
| 0774_1a20  | FQ377826                      | B14            | CTCCCTCTCTCTTTCTCTTT    | CCCATATCAGTGACAAAGAAC   | 54                   | 175-189 | Stolle et al., 2011 |
| 0777_1j15  | FQ377827                      | B10            | TGCACTCATAGAATGAGAAAGA  | GGATTTGTGGACGTTAATTG    | 55                   | 152-166 | Stolle et al., 2011 |
| 0795_67k24 | FQ377830                      | B03            | GAATTCACAGAGAACAATTC    | TAAATTTACGAGTTTGCACAAG  | 60                   | 161-169 | Stolle et al., 2011 |
| 0801_67f8  | FQ377832                      | B01            | ATACTGTACGCGCATGTAATAA  | TAATTTCTTCTCCTCGTTTCTC  | 55                   | 167-195 | Stolle et al., 2011 |
| 0803_67i16 | FQ377833                      | B10            | CCAGGTAAAGGTAACAAATCAC  | GTGTTAGGGACACGTCAAGT    | 60                   | 172     | Stolle et al., 2011 |
| 0810_65a23 | FQ377835                      | B06            | TTAACAAATCCGAATTTAAAGG  | GATAGTGGTTGCTTGTCTCTCT  | 55                   | 136-140 | Stolle et al., 2011 |
| 0811_65m2  | FQ377836                      | B08            | TACAACCTTGACGAGGAAATAGG | TTAAGCGAGCCCTATACTTATG  | 60                   | 180-188 | Stolle et al., 2011 |
| 0867_70k14 | FQ377846                      | B12            | ATATTACATTCCTGGTGACCTC  | CTACATTCTTTCTGTTCCCTGT  | 60                   | 177-181 | Stolle et al., 2011 |
| 0869_70d5  | FQ377847                      | B08            | ATCTGATATCTATGCGCTCTTT  | AAGCAGATGGGTTAAGTGTAGT  | 60                   | 163-175 | Stolle et al., 2011 |
| 0885_52p13 | FQ377850                      | B02            | TTCATACTCTTTCACAGCCTCT  | AATGACGAGATGAGACTGAAAT  | 60                   | 160-164 | Stolle et al., 2011 |
| 0887_52l8  | FQ377851                      | B09            | GGCGAGTGTAACGTTGTATTT   | GATATTACGCTCTGGAACCAA   | 60                   | 187-191 | Stolle et al., 2011 |
| 0904_31d21 | FQ377854                      | B14            | TTAAACCGAGGAGAGAGATTAC  | GAGAAGAGACGTTTGAGAGAAC  | 60                   | 204-212 | Stolle et al., 2011 |
| 0916_31f17 | FQ377858                      | B06            | CCCATCAAATTTAACTGTTCTT  | GCGAGTCATTACTGTCTCTCTT  | 60                   | 170     | Stolle et al., 2011 |
| 0917_31j16 | FQ377859                      | B16            | GTGTGGAAGAGACGAGATAGAT  | CTTCTTCGTCACGTTTACTCTC  | 60                   | 188-204 | Stolle et al., 2011 |
| 0919_66k13 | FQ377861                      | B01            | TAGACCGATTTGTTACTGATTG  | CATGCTGTTATGGTATTTCTGA  | 60                   | 164     | Stolle et al., 2011 |
| 0930_40o1  | FQ377864                      | B11            | GCTGAAAAGCTCGACTTCTAC   | AAATTTCTCACTGCTAAGAGGA  | 60                   | 157-177 | Stolle et al., 2011 |
| 0939_33h17 | FQ377865                      | B01            | GAACACAGCGAGAAAGAGAG    | CATTATCGTGTGAACCTGGAC   | 60                   | 152-174 | Stolle et al., 2011 |
| 0940_33f14 | FQ377866                      | B02            | AGTGGAAATCTCACACATGC    | AGGAGTTTCGTCGTTTCTTT    | 60                   | 175-177 | Stolle et al., 2011 |
| 0942_23k3  | FQ377867                      | B06            | TCTCATTTCTCTCCTTCTTCC   | ATACAAGAAACGAGCCAGATAC  | 60                   | 223-225 | Stolle et al., 2011 |

| Marker     | Accession number<br>(GenBank) | LG <i>B.t.</i> | Forward primer sequence   | Reverse primer sequence   | <i>T<sub>a</sub></i> | Range   | Source                      |
|------------|-------------------------------|----------------|---------------------------|---------------------------|----------------------|---------|-----------------------------|
| 0950_23a2  | FQ377870                      | B18            | CGTACTAAACGGTGTATCGTC     | GTAATTGAGCTCTCCTGTGG      | 60                   | 182     | Stolle et al., 2011         |
| 0956_26c17 | FQ377871                      | B02            | TCTCTTGCTTCTCGTTCTACTT    | GGCTCTTAAACCAGACAGTTT     | 60                   | 173-175 | Stolle et al., 2011         |
| Apis_UN075 | AADG05004561                  | B06            | GTCGTGCGATGAAAGGCC        | GCAACCTCGTGCCCAGAT        | 0                    | 0       | Solignac et al., 2007       |
| B118       |                               | B03            | CCTAAGTCGCTATATCTTCCG     | GAAACACGTATCTACATCTACAG   | 57                   | 240     | Estoup et al., (1993; 1995) |
| BL02       |                               | B01            | GAACAGTGAGAGCGAGGAACAGAG  | TTGCCACGTATATCCGAGCGAACC  | 52                   | 163-171 | Reber-Funk et al., (2006)   |
| BL05       |                               | B07            | CGTTCAACATTAGATGTAGAGTACC | CGGACACAAGTAATAAGATAGG    | 50                   | 176-178 | Reber-Funk et al., (2006)   |
| BL13       |                               | B15            | CGAATGTTGGGATTTTCGTG      | GCGAGTACGTGTACGTGTTCTATG  | 53                   | 205-217 | Reber-Funk et al., (2006)   |
| BL16       |                               | B13            | CGTCCTCTCCAATGTGTGACTC    | GGATCGGTTTAAACAACGAAGTC   | 48                   | 124-140 | Reber-Funk et al., (2006)   |
| Boro115    | HQ682231                      | B06            | AGGAACCGAGCGATAGAACCAC    | GCTTTGCCTTTCCATCTTGCTG    | 47                   | 175-183 | Stolle et al., 2011         |
| BT02       |                               | B11            | AGGAACCGAGCGATAGAACCAC    | GCTTTGCCTTTCCATCTTGCTG    | 53                   | 175-183 | Reber-Funk et al., (2006)   |
| BT05       |                               | B02            | TTTCCTATGCCGAACGTCACC     | CCCAGATAAAAGACCGCCTCTAGTC | 53                   | 194-220 | Reber-Funk et al., (2006)   |
| BT08       |                               | B03            | AGAACCTCCGTATCCCTTCG      | AGCCTACCCAGTGCTGAAAC      | 52                   | 208-230 | Reber-Funk et al., (2006)   |
| BT10       |                               | B08            | TCTTGCTATCCACCACCCGC      | GGACAGAAGCATAGACGCACCG    | 53                   | 178-188 | Reber-Funk et al., (2006)   |
| BT11       |                               | B09            | AAGAGAGAGACAGAGAGATAGGG   | GCGTTTTGACGATTAGATTAGAGCC | 52                   | 153-177 | Reber-Funk et al., (2006)   |
| BT15       |                               | B15            | ACTTAGCCAGCCATCGCTAC      | CTCTCTCTTCTCTCTTATACGC    | 53                   | 182-214 | Reber-Funk et al., (2006)   |
| BT20       |                               | B10            | TTCCACAGCGTTTTCTTAAGTC    | ATGGACGGCGAGATCGTGAG      | 52                   | 157-165 | Reber-Funk et al., (2006)   |
| BT23       |                               | B11            | GCAACAGAAAATCGTCGGTAGTG   | GCGGCAATAAAGCAATCGG       | 54                   | 198-216 | Reber-Funk et al., (2006)   |
| BT24       |                               | B07            | TCTTCCGTTTTCCCCCTG        | CACCCACTTACATACATACACGCTC | 52                   | 227-257 | Reber-Funk et al., (2006)   |
| BT30       |                               | B12            | ATCGTATTATTGCCACCAACCG    | CAGCAACAGTCACAACAAACGC    | 53                   | 201-203 | Reber-Funk et al., (2006)   |
| BTERN01    |                               | B11            | CGTGTTTAGGGTACTGGTGGTC    | GGAGCAAGAGGGCTAGACAAAAG   | 49                   | 120-122 | Reber-Funk et al., (2006)   |
| BTMS0071   | FJ616203                      | B15            | CGCGTAAATTATCCCTCCC       | CCATCTCGCGCAGAATGTTT      | 57                   | 237-239 | Stolle et al., (2009)       |
| BTMS0081   | FJ616212                      | B06            | ACGCGCGCCTTCTACTATC       | AGGGACACGCGAACAGAC        | 60                   | 321-327 | Stolle et al., (2009)       |
| BTMS0087   | FJ616218                      | B10            | CGCGACGTATAGACAGAGGA      | AGTGCCAGCGCTAAAGTAT       | 60                   | 202-210 | Stolle et al., (2009)       |
| BTMS0093   | FJ616224                      | B09            | AGATTGCGATGGCTAAAGTCG     | AAAGTCTCTACTGTGCGCT       | 51                   | 316-320 | Stolle et al., (2009)       |
| BTMS0099   | FJ616230                      | B06            | TGTCGGTGTTC AACACTTTGT    | AAAGAGGCGACTACGGTCAA      | 51                   | 192-196 | Stolle et al., (2009)       |
| BTMS0102   | FJ616233                      | B12            | AATCGCAAGGGAAAACGTCC      | TCTTCTCCGGTGTTCGGA        | 60                   | 219-225 | Stolle et al., (2009)       |
| BTMS0103   | FJ616234                      | B15            | CAGGTGTTGCCGGCTAGATA      | CTCAACGGATCTGGGACAGT      | 55                   | 314-343 | Stolle et al., (2009)       |
| BTMS0124   | FJ616254                      | B06            | CGCCGTAATGTTAACTCC        | ACTCAATCCAAACGCCACC       | 54                   | 270     | Stolle et al., (2009)       |

| <b>Marker</b> | <b>Accession number<br/>(GenBank)</b> | <b>LG <i>B.t.</i></b> | <b>Forward primer sequence</b> | <b>Reverse primer sequence</b> | <b><i>Ta</i></b> | <b>Range</b> | <b>Source</b>         |
|---------------|---------------------------------------|-----------------------|--------------------------------|--------------------------------|------------------|--------------|-----------------------|
| BTMS0129      | FJ616259                              | B10                   | CCTCGCGAATAGATAAAT             | AGCTACCGTGCCTGTCC              | 55               | 154-160      | Stolle et al., (2009) |
| BTMS0130      | FJ616260                              | B09                   | AGACAAAGGGAGATGGTG             | TTTCGTTCCCTCGTGCTAC            | 52               | 302-306      | Stolle et al., (2009) |
| BTMS0131      | FJ616261                              | B10                   | TACAAACGATGCGTGAGG             | AGTCAAGTAAGTCCTACCG            | 48               | 331-335      | Stolle et al., (2009) |
| BTMS0147      | FJ616276                              | B15                   | TTGAGAAAGTAGAAAAATGGA          | TCTGTTTATCGATCCTCTTC           | 51               | 170-174      | Stolle et al., (2009) |
