# Supplementary material for: Quantitative Trait Loci for Light Sensitivity, Body Weight, Body Size, and Morphological Eye Parameters in the Bumblebee, Bombus terrestris
Source: PubMed Central journal article supplement (PMC4415782; doi:10.1371/journal.pone.0125011), 2015-04-30
Supplement: pone.0125011.s004.pdf [file pone.0125011.s004.pdf]

**Quantitative trait loci for light sensitivity, body weight, body size, and morphological eye parameters in the bumblebee, *Bombus terrestris***

Kevin Maebe<sup>1</sup>, Ivan Meeus<sup>1</sup>, Jan De Riek<sup>2</sup>, Guy Smagghe<sup>1,\*</sup>

**S3\_Table: Kolmogorov-Smirnov test of normality for each trait.**

| Trait    | Kolmogorov-Smirnov <sup>a</sup> |    |       |
|----------|---------------------------------|----|-------|
|          | Statistic                       | df | Sig.  |
| RC       | 0.091                           | 87 | 0.071 |
| MT_L     | 0.088                           | 87 | 0.095 |
| MT_B     | 0.102                           | 87 | 0.026 |
| Ti_L     | 0.094                           | 87 | 0.057 |
| TI_B     | 0.053                           | 87 | 0.200 |
| Fe_L     | 0.119                           | 87 | 0.004 |
| Fe_B     | 0.300                           | 87 | 0.000 |
| Tr_L     | 0.074                           | 87 | 0.200 |
| Tr_B     | 0.120                           | 87 | 0.004 |
| Tarsus   | 0.092                           | 87 | 0.066 |
| Poot     | 0.104                           | 87 | 0.021 |
| E_L      | 0.124                           | 87 | 0.002 |
| E_B      | 0.186                           | 87 | 0.000 |
| Facet    | 0.135                           | 87 | 0.000 |
| Ocel     | 0.077                           | 87 | 0.200 |
| E_S      | 0.147                           | 87 | 0.000 |
| Omma     | 0.102                           | 87 | 0.027 |
| BLUE     | 0.271                           | 87 | 0.000 |
| UV       | 0.177                           | 87 | 0.000 |
| Weight   | 0.060                           | 87 | 0.200 |
| log_blue | 0.174                           | 87 | 0.000 |
| log_uv   | 0.166                           | 87 | 0.000 |
| Pc1_E    | 0.134                           | 87 | 0.001 |
| Pc2_E    | 0.152                           | 87 | 0.000 |
| Pc3_E    | 0.066                           | 87 | 0.200 |
| Pc1_S    | 0.081                           | 87 | 0.200 |
| Pc2_S    | 0.131                           | 87 | 0.001 |
| Pc3_S    | 0.176                           | 87 | 0.000 |
| Pc4_S    | 0.066                           | 87 | 0.200 |
| Pc5_S    | 0.150                           | 87 | 0.000 |
