# Supplementary material for: Quantitative Trait Loci for Light Sensitivity, Body Weight, Body Size, and Morphological Eye Parameters in the Bumblebee, Bombus terrestris
Source: PubMed Central journal article supplement (PMC4415782; doi:10.1371/journal.pone.0125011), 2015-04-30
Supplement: pone.0125011.s005.pdf [file pone.0125011.s005.pdf]

**Quantitative trait loci for light sensitivity, body weight, body size, and morphological eye parameters in the bumblebee, *Bombus terrestris***

Kevin Maebe<sup>1</sup>, Ivan Meeus<sup>1</sup>, Jan De Riek<sup>2</sup>, Guy Smagghe<sup>1,\*</sup>

**S4\_Table: PCA of the different body size traits and eye parameters. The eigenvalues and eigenvectors of the Principal Component Analysis of: (i) the different body size traits and (ii) the eye parameters.**

**(i) Principal Component Analysis (PCA): *body size parameters***

*Eigenvalues*

| PC | Eigenvalues | % Variation | Cum.% Variation |
|----|-------------|-------------|-----------------|
| 1  | 5,91        | 53,8        | 53,8            |
| 2  | 1,57        | 14,2        | 68,0            |
| 3  | 0,996       | 9,1         | 77,1            |
| 4  | 0,716       | 6,5         | 83,6            |
| 5  | 0,656       | 6,0         | 89,5            |

*Eigenvectors*

(Coefficients in the linear combinations of variables making up PC's)

| Variable    | PC1    | PC2    | PC3    | PC4    | PC5    |
|-------------|--------|--------|--------|--------|--------|
| Radial cell | -0,239 | -0,179 | -0,129 | 0,783  | -0,395 |
| Mt_L        | -0,373 | -0,085 | -0,189 | 0,053  | 0,055  |
| Mt_W        | -0,362 | -0,092 | -0,173 | -0,205 | 0,126  |
| Ti_L        | -0,395 | -0,044 | -0,153 | -0,043 | 0,070  |
| Ti_W        | -0,346 | -0,101 | -0,179 | -0,313 | -0,081 |
| Fe_L        | -0,356 | -0,049 | -0,311 | -0,113 | -0,055 |
| Fe_W        | -0,210 | -0,130 | 0,575  | -0,218 | -0,681 |
| Tr_L        | -0,225 | -0,319 | 0,461  | -0,162 | 0,285  |
| Tr_W        | -0,250 | -0,104 | 0,430  | 0,391  | 0,516  |
| Tarsus      | -0,239 | 0,635  | 0,135  | 0,045  | 0,005  |
| Leg         | -0,237 | 0,636  | 0,136  | 0,029  | -0,015 |

**(ii) Principal Component Analysis (PCA): *eye parameters***

*Eigenvalues*

| PC | Eigenvalues | % Variation | Cum.% Variation |
|----|-------------|-------------|-----------------|
| 1  | 4,45        | 74,1        | 74,1            |
| 2  | 0,654       | 10,9        | 85,0            |
| 3  | 0,488       | 8,1         | 93,2            |

*Eigenvectors*

(Coefficients in the linear combinations of variables making up PC's)

| Variable | PC1    | PC2    | PC3    |
|----------|--------|--------|--------|
| E_L      | -0,458 | -0,013 | 0,118  |
| E_W      | -0,456 | -0,021 | 0,113  |
| Facet    | -0,325 | 0,829  | -0,319 |
| MOc      | -0,388 | -0,235 | 0,521  |
| E_S      | -0,453 | 0,030  | 0,134  |
| Om       | -0,347 | -0,506 | -0,763 |
