# Supplementary material for: Quantitative Trait Loci for Light Sensitivity, Body Weight, Body Size, and Morphological Eye Parameters in the Bumblebee, Bombus terrestris
Source: PubMed Central journal article supplement (PMC4415782; doi:10.1371/journal.pone.0125011), 2015-04-30
Supplement: pone.0125011.s006.pdf [file pone.0125011.s006.pdf]

**Quantitative trait loci for light sensitivity, body weight, body size, and morphological eye parameters in the bumblebee, *Bombus terrestris***

Kevin Maebe<sup>1</sup>, Ivan Meeus<sup>1</sup>, Jan De Riek<sup>2</sup>, Guy Smagghe<sup>1,\*</sup>

**S5\_Table: List of candidate genes for critical light sensitivity of bumblebee drones in blue light. List of the place, accession number, name and annotation information of all genes, at suggestive QTL qBLU3 on LG 3, which can all be linked with the critical light sensitivity of bumblebee drones in blue light.**

| start   | stop    | Accession      | Locus        | Description                                                                           |
|---------|---------|----------------|--------------|---------------------------------------------------------------------------------------|
| 1379268 | 1440568 | XM_003394234.1 | LOC100651751 | sex-regulated protein janus-A-like (LOC100651751), mRNA                               |
| 1380872 | 1425353 | XM_003394227.1 | LOC100650954 | phosrestin-1-like (LOC100650954), mRNA                                                |
| 1444315 | 1449818 | XM_003394350.1 | LOC100646286 | hypothetical protein LOC100646286 (LOC100646286), mRNA                                |
| 1450487 | 1452349 | XM_003394349.1 | LOC100646173 | hypothetical protein LOC100646173 (LOC100646173), mRNA                                |
| 1500499 | 1526455 | XM_003394228.1 | LOC100651071 | hypothetical protein LOC100651071 (LOC100651071), mRNA                                |
| 1563777 | 1575057 | XM_003394224.1 | LOC100650594 | probable ATP-dependent RNA helicase CG8611-like (LOC100650594), mRNA                  |
| 1574645 | 1588141 | XM_003394225.1 | LOC100650718 | hypothetical protein LOC100650718 (LOC100650718), mRNA                                |
| 1592463 | 1595546 | XM_003394223.1 | LOC100650476 | integrator complex subunit 10-like (LOC100650476), mRNA                               |
| 1594866 | 1601254 | XM_003394221.1 | LOC100650237 | protein transport protein Sec31A-like (LOC100650237), mRNA                            |
| 1601991 | 1605404 | XM_003394220.1 | LOC100650112 | polypeptide N-acetylgalactosaminyltransferase 3-like (LOC100650112), mRNA             |
| 1612411 | 1629559 | XM_003394348.1 | LOC100646056 | hypothetical protein LOC100646056 (LOC100646056), mRNA                                |
| 1740947 | 1796898 | XM_003394219.1 | LOC100649991 | transcription factor hamlet-like (LOC100649991), mRNA                                 |
| 1965450 | 1986889 | XM_003394347.1 | LOC100645939 | SPRY domain-containing SOCS box protein 1-like (LOC100645939), mRNA                   |
| 1994868 | 1996819 | XM_003394346.1 | LOC100645823 | hypothetical protein LOC100645823 (LOC100645823), mRNA                                |
| 2007601 | 2024300 | XM_003394218.1 | LOC100649874 | cyclin-dependent kinase 5 activator 1-like (LOC100649874), mRNA                       |
| 2028512 | 2029978 | XM_003394217.1 | LOC100649763 | protein transport protein SFT2-like (LOC100649763), mRNA                              |
| 2029943 | 2031725 | XR_131866.1    | LOC100649651 | hypothetical LOC100649651 (LOC100649651), miscRNA                                     |
| 2033121 | 2041004 | XM_003394216.1 | LOC100649528 | hypothetical protein LOC100649528 (LOC100649528), mRNA                                |
| 2048620 | 2057193 | XM_003394215.1 | LOC100649406 | serine/threonine-protein phosphatase 4 regulatory subunit 4-like (LOC100649406), mRNA |
| 2058202 | 2237814 | XM_003394213.1 | LOC100649165 | hypothetical protein LOC100649165 (LOC100649165), mRNA                                |
| 2154619 | 2155506 | XM_003394214.1 | LOC100649286 | hypothetical protein LOC100649286 (LOC100649286), mRNA                                |
| 2239904 | 2242915 | XM_003394344.1 | LOC100645588 | hypothetical protein LOC100645588 (LOC100645588), mRNA                                |

| start   | stop    | Accession      | Locus        | Description                                                                            |
|---------|---------|----------------|--------------|----------------------------------------------------------------------------------------|
| 2242543 | 2245756 | XM_003394212.1 | LOC100649049 | kelch domain-containing protein 10-like (LOC100649049), mRNA                           |
| 2250046 | 2266693 | XR_131865.1    | LOC100648815 | hypothetical LOC100648815 (LOC100648815), miscRNA                                      |
| 2265285 | 2270449 | XM_003394211.1 | LOC100648931 | hypothetical protein LOC100648931 (LOC100648931), mRNA                                 |
| 2270494 | 2271893 | XM_003394210.1 | LOC100648703 | DNA repair protein RAD51 homolog 4-like (LOC100648703), mRNA                           |
| 2275283 | 2295240 | XM_003394209.1 | LOC100648591 | hypothetical protein LOC100648591 (LOC100648591), mRNA                                 |
| 2297014 | 2299967 | XM_003394208.1 | LOC100648391 | cytochrome P450 6k1-like (LOC100648391), mRNA                                          |
| 2299671 | 2305966 | XM_003394207.1 | LOC100648275 | DNA topoisomerase 2-binding protein 1-like (LOC100648275), mRNA                        |
| 2306495 | 2489235 | XM_003394206.1 | LOC100648160 | protein-tyrosine sulfotransferase-like (LOC100648160), mRNA                            |
| 2490288 | 2494623 | XM_003394205.1 | LOC100648049 | protein MTO1 homolog, mitochondrial-like (LOC100648049), mRNA                          |
| 2499310 | 2650532 | XM_003394204.1 | LOC100647927 | probable G-protein coupled receptor Mth-like 1-like (LOC100647927), mRNA               |
| 2668080 | 2681265 | XM_003394203.1 | LOC100647804 | hypothetical protein LOC100647804 (LOC100647804), mRNA                                 |
| 2720952 | 2732569 | XM_003394202.1 | LOC100647689 | GTP-binding protein Rhes-like (LOC100647689), mRNA                                     |
| 2733853 | 2735909 | XM_003394201.1 | LOC100647569 | hypothetical protein LOC100647569 (LOC100647569), mRNA                                 |
| 2811892 | 2813218 | XM_003394343.1 | LOC100645483 | somatostatin receptor type 4-like (LOC100645483), mRNA                                 |
| 2871628 | 2940085 | XM_003394199.1 | LOC100647330 | guanylate cyclase 32E-like (LOC100647330), mRNA                                        |
| 2939790 | 2940990 | XM_003394200.1 | LOC100647452 | NADH dehydrogenase [ubiquinone] 1 alpha subcomplex subunit 6-like (LOC100647452), mRNA |
| 2941318 | 2944004 | XM_003394198.1 | LOC100647213 | tRNA-splicing ligase RtcB homolog (LOC100647213), mRNA                                 |
| 2944108 | 3059184 | XR_131874.1    | LOC100645366 | hypothetical LOC100645366 (LOC100645366), miscRNA                                      |
| 3062781 | 3065425 | XM_003394195.1 | LOC100646894 | pescadillo homolog (LOC100646894), mRNA                                                |
| 3065480 | 3070181 | XM_003394194.1 | LOC100646771 | protein pelota-like (LOC100646771), mRNA                                               |
| 3070000 | 3073295 | XM_003394196.1 | LOC100647012 | probable serine hydrolase-like, transcript variant 1 (LOC100647012), mRNA              |
| 3070000 | 3074784 | XM_003394197.1 | LOC100647012 | probable serine hydrolase-like, transcript variant 2 (LOC100647012), mRNA              |
| 3075349 | 3076615 | XM_003394193.1 | LOC100646650 | hypothetical protein LOC100646650 (LOC100646650), mRNA                                 |
| 3076597 | 3081931 | XM_003394192.1 | LOC100646529 | UPF0636 protein C4orf41 homolog (LOC100646529), mRNA                                   |
| 3082052 | 3084507 | XM_003394191.1 | LOC100646403 | probable G-protein coupled receptor AH9.1-like (LOC100646403), mRNA                    |
| 3086097 | 3087571 | XM_003394342.1 | LOC100645238 | lymphokine-activated killer T-cell-originated protein kinase-like (LOC100645238), mRNA |
| 3087641 | 3094415 | XM_003394190.1 | LOC100646285 | syntaxin-1A homolog (LOC100646285), mRNA                                               |
| 3088939 | 3095239 | XM_003394189.1 | LOC100646172 | condensin-2 complex subunit D3-like (LOC100646172), mRNA                               |
| 3097469 | 3108358 | XM_003394188.1 | LOC100646055 | ankyrin repeat domain-containing protein 29-like (LOC100646055), mRNA                  |
| 3108776 | 3118908 | XM_003394187.1 | LOC100645904 | acyl carrier protein, mitochondrial-like (LOC100645904), mRNA                          |
| 3109468 | 3117237 | XM_003394185.1 | LOC100645705 | TBC1 domain family member 9-like, transcript variant 1 (LOC100645705), mRNA            |
| 3109535 | 3116937 | XM_003394186.1 | LOC100645705 | TBC1 domain family member 9-like, transcript variant 2 (LOC100645705), mRNA            |
| 3119005 | 3122275 | XM_003394182.1 | LOC100645365 | mps one binder kinase activator-like 4-like (LOC100645365), mRNA                       |
| 3121758 | 3138923 | XM_003394183.1 | LOC100645482 | alba-like protein C9orf23 homolog (LOC100645482), mRNA                                 |

| <b>start</b> | <b>stop</b> | <b>Accession</b> | <b>Locus</b> | <b>Description</b>                                                      |
|--------------|-------------|------------------|--------------|-------------------------------------------------------------------------|
| 3127235      | 3130577     | XM_003394180.1   | LOC100644997 | aromatic-L-amino-acid decarboxylase-like (LOC100644997), mRNA           |
| 3133043      | 3137030     | XM_003394181.1   | LOC100645237 | histidine decarboxylase-like (LOC100645237), mRNA                       |
| 3137421      | 3138388     | XM_003394184.1   | LOC100645587 | peptidyl-prolyl cis-trans isomerase H-like (LOC100645587), mRNA         |
| 3139162      | 3142194     | XR_131864.1      | LOC100645116 | zinc finger protein 595-like (LOC100645116), miscRNA                    |
| 3142893      | 3146252     | XM_003394179.1   | LOC100644877 | cGMP-dependent protein kinase, isozyme 1-like (LOC100644877), mRNA      |
| 3146544      | 3170527     | XR_131863.1      | LOC100644751 | ATP-binding cassette sub-family C member 9-like (LOC100644751), miscRNA |
| 3178322      | 3510902     | XM_003394178.1   | LOC100644512 | RNA binding protein fox-1 homolog 2-like (LOC100644512), mRNA           |
| 3178340      | 3363539     | XM_003394177.1   | LOC100644512 | RNA binding protein fox-1 homolog 2-like (LOC100644512), mRNA           |
